# Supplementary material
Source: Springer Nature journal article supplement (https://www.springermedizin.de/resource/supplementary/12888_2008_504_MOESM1_ESM.pdf/9483446)
Supplement: MOESM1 [file 9483446]

**Study name****Statistics for each study****Std diff in means and 95% CI****Std diff in means**   **Lower limit**   **Upper limit**   **p-Value**

Hunkeler 2000   0.35   0.10   0.60   0.01

Lynch 1997   0.95   -0.09   1.99   0.07

Lynch1 2004   0.08   -0.90   1.06   0.87

Lynch2 2004   0.28   -0.72   1.28   0.58

Miller 2002   0.46   -0.27   1.19   0.21

Mohr 2000   0.58   -0.13   1.29   0.11

Simon 2006   0.49   0.27   0.71   0.00

0.44   0.29   0.59   0.00

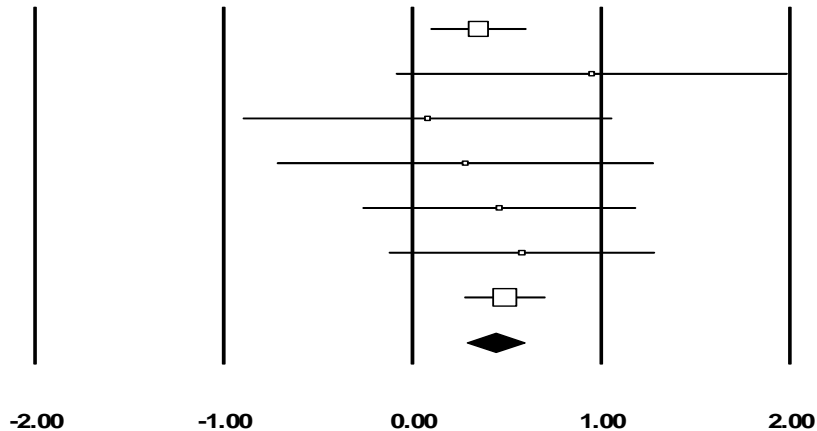

Favours Control

Favours Technology
